# Supplementary material
Source: Springer Nature journal article supplement (https://www.springermedizin.de/resource/supplementary/12936_2012_2233_MOESM4_ESM.pdf/9542614)
Supplement: MOESM4 [file 9542614]

## *Anopheles gambiae s.l*

$\frac{\text{CB-ITT}}{\text{QA-HLC+QA-ITT}}$

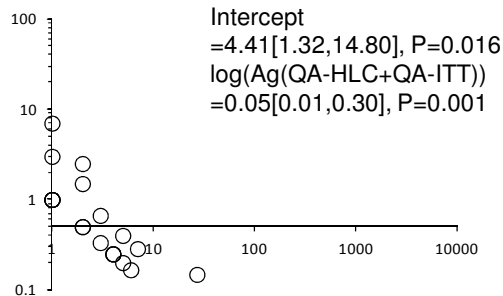

$\frac{\text{QA-ITT}}{\text{QA-HLC+QA-ITT}}$

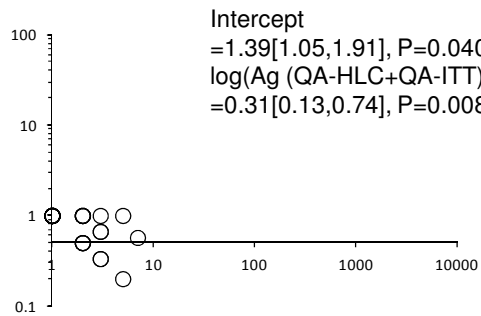

## *Culex*

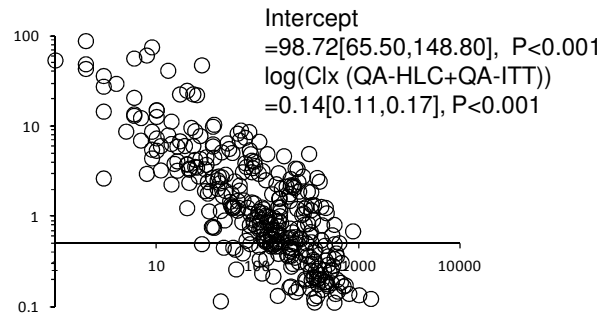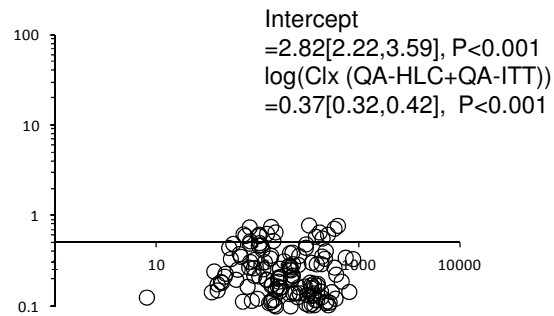

QA-HLC+QA-ITT
